# Supplementary material for: NiCo2O4/RGO Hybrid Nanostructures on Surface-Modified Ni Core for Flexible Wire-Shaped Supercapacitor
Source: PubMed Central journal article supplement (PMC8066179; doi:10.3390/nano11040852), 2021-03-26
Supplement: nanomaterials-11-00852-s001.pdf [file nanomaterials-11-00852-s001.pdf]

## **Supplementary Materials**

**NiCo<sub>2</sub>O<sub>4</sub>/RGO hybrid nanostructures on surface-modified Ni core for flexible wire-shaped supercapacitor**

**Prashant Shivaji Shewale and Kwang-Seok Yun \***

Department of Electronic Engineering, Sogang University, Seoul, 04107, Republic of Korea

[prashantshewale11@gmail.com](mailto:prashantshewale11@gmail.com), \* Corresponding Author: [ksyun@sogang.ac.kr](mailto:ksyun@sogang.ac.kr)

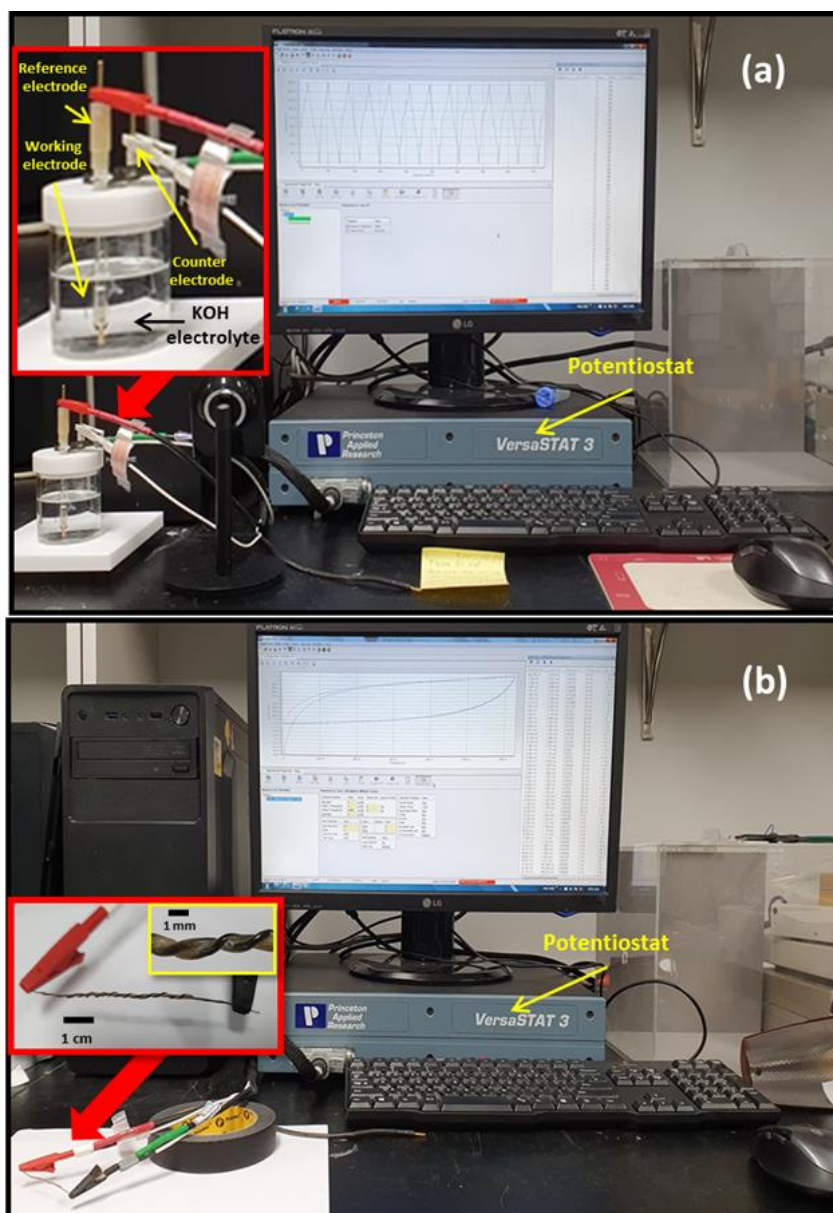

**Fig. S1.** Photographs of the experimental set-up for (a) single electrode characterization by the three-electrode configuration, (b) WSC characterization by the two-electrode configuration.

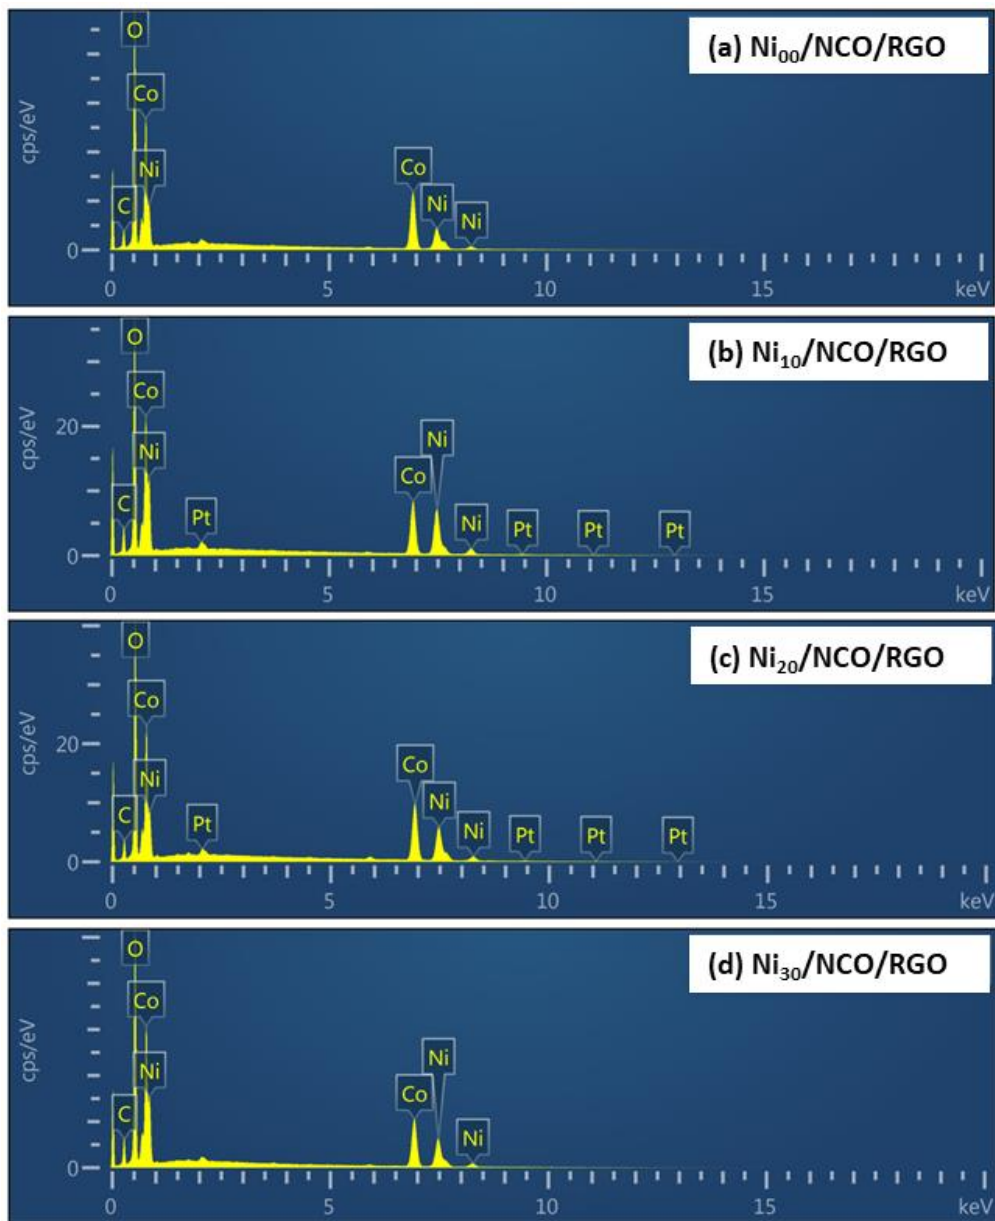

**Fig. S2.** EDS spectra of various Ni/NCO/RGO electrodes with different substrate etching durations.

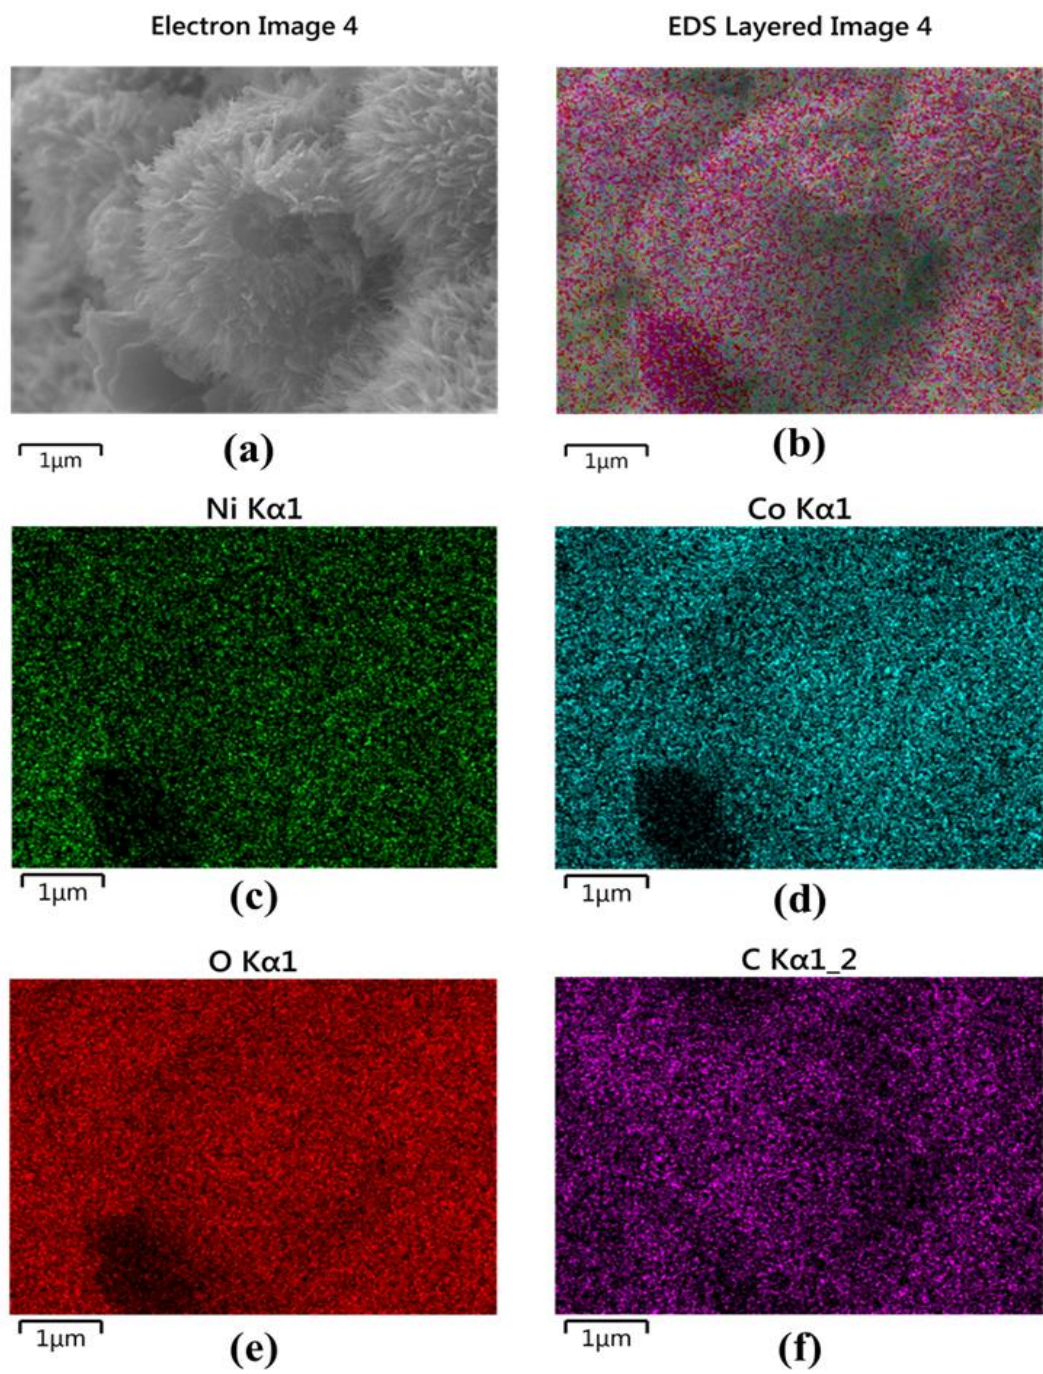

**Fig. S3.** (a) FE-SEM image, (b) EDS layer image, and the EDS mapping of (c) Ni (d) Co, (e) O, (f) C elements of  $\text{Ni}_{10}/\text{NCO}/\text{RGO}$  electrode.

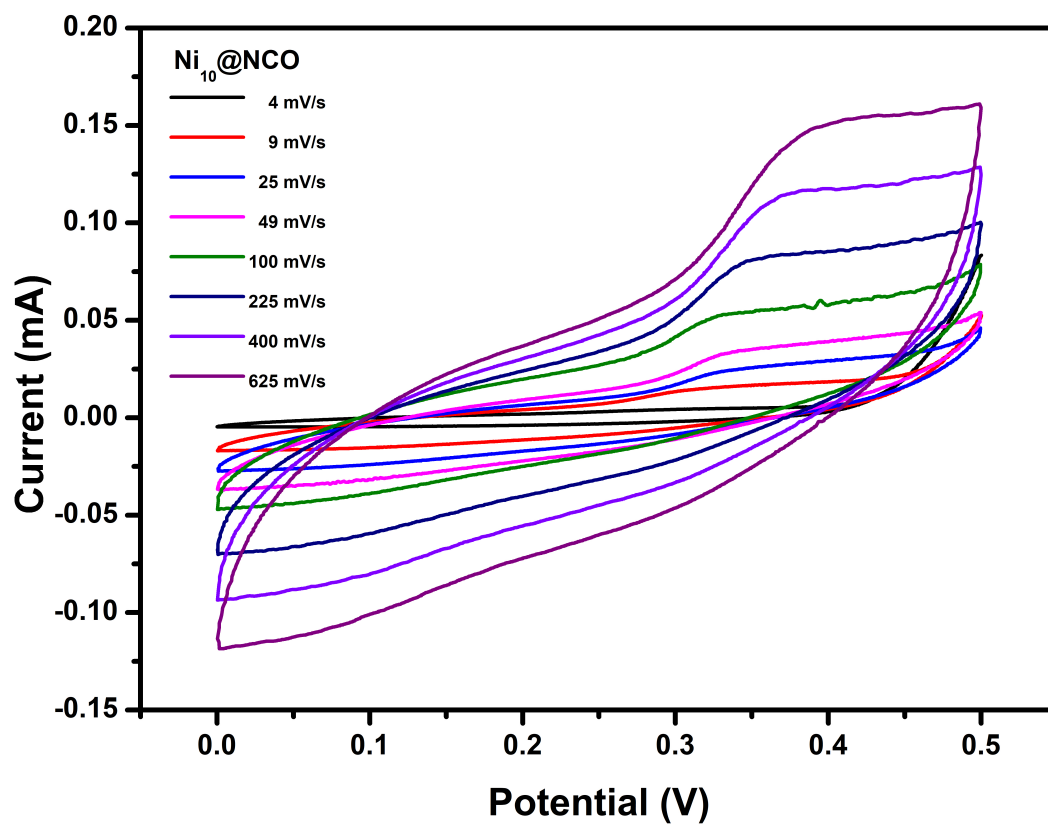

**Fig. S4.** CV curves of Ni/NCO electrode at various scan rates under 0-0.5 V potential window.

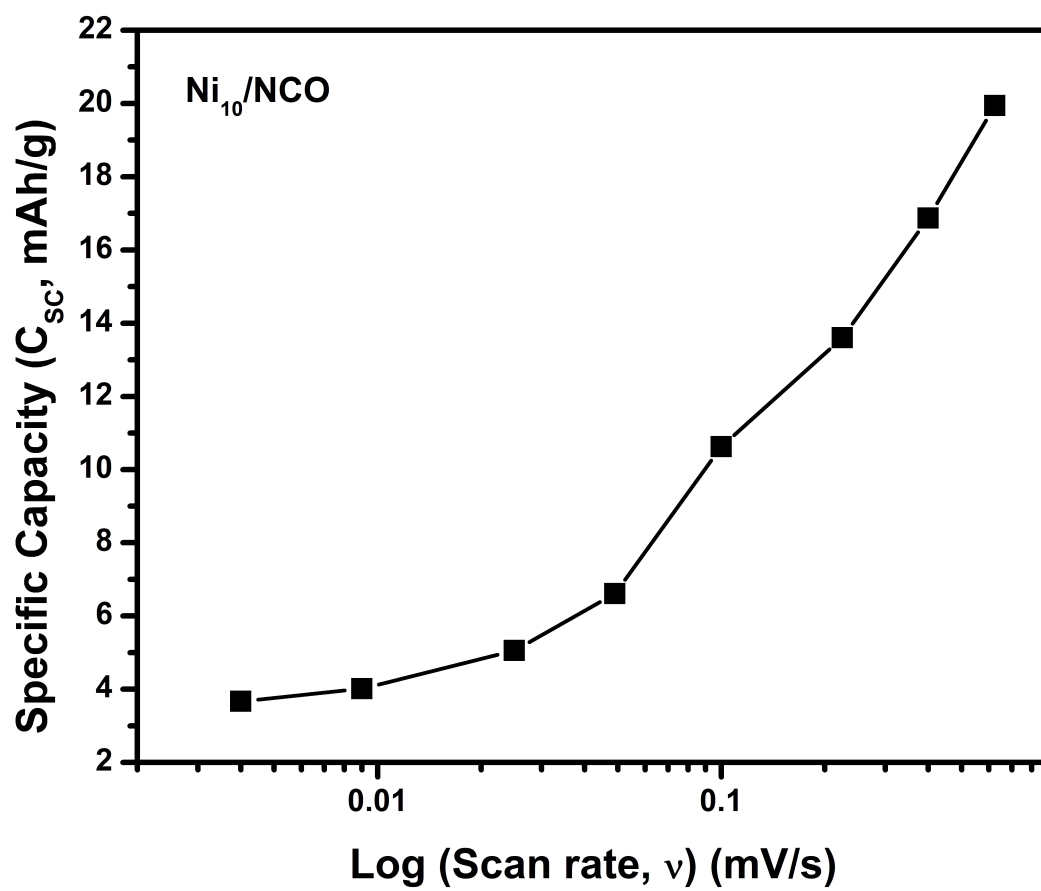

Fig. S5. Specific capacity of Ni/NCO electrode at various scan rates.

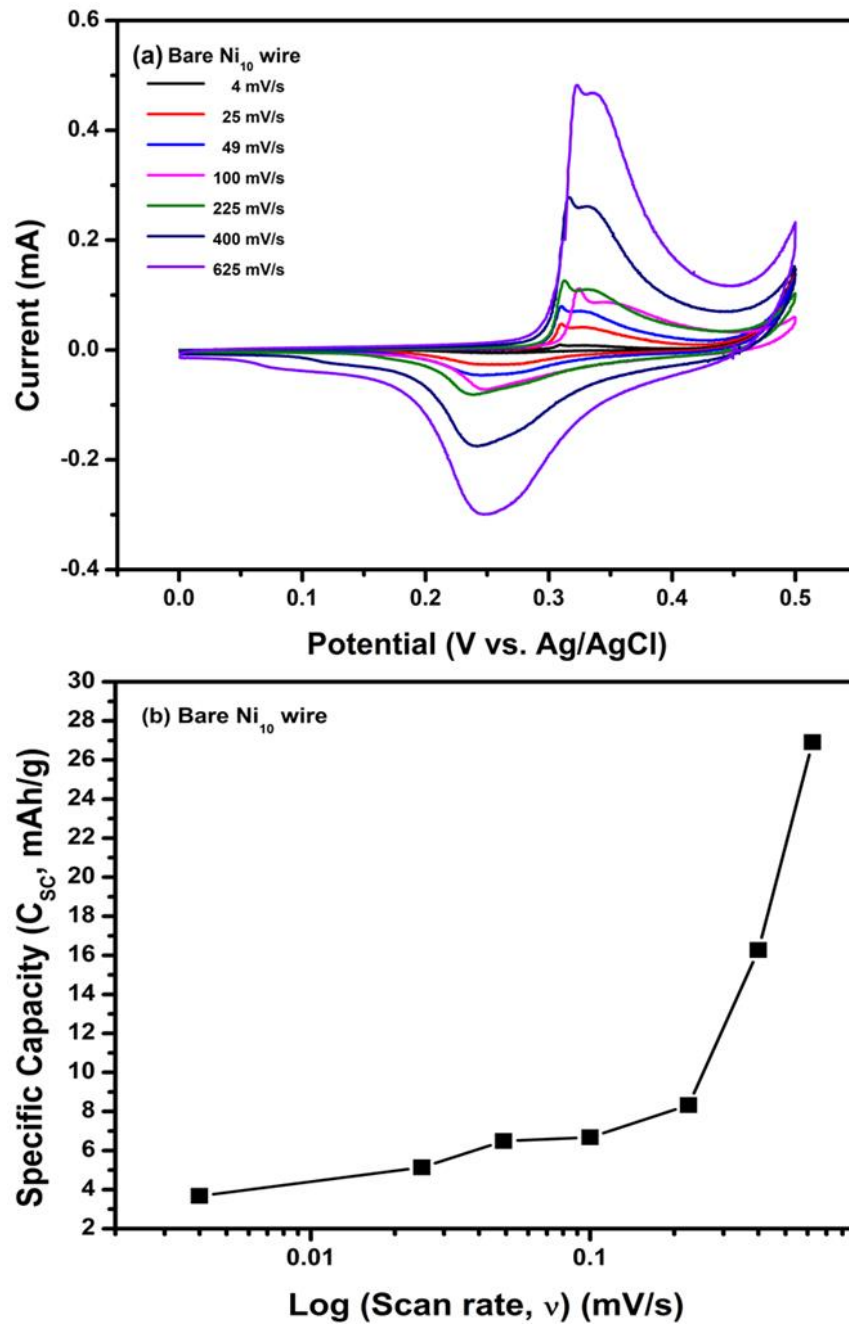

**Fig. S6.** Electrochemical characterization of bare Ni<sub>10</sub> wire electrode: (a) CV curves at various scan rates under 0-0.5 V potential window, and (b) specific capacity of bare Ni<sub>10</sub> wire electrode at various scan rates.

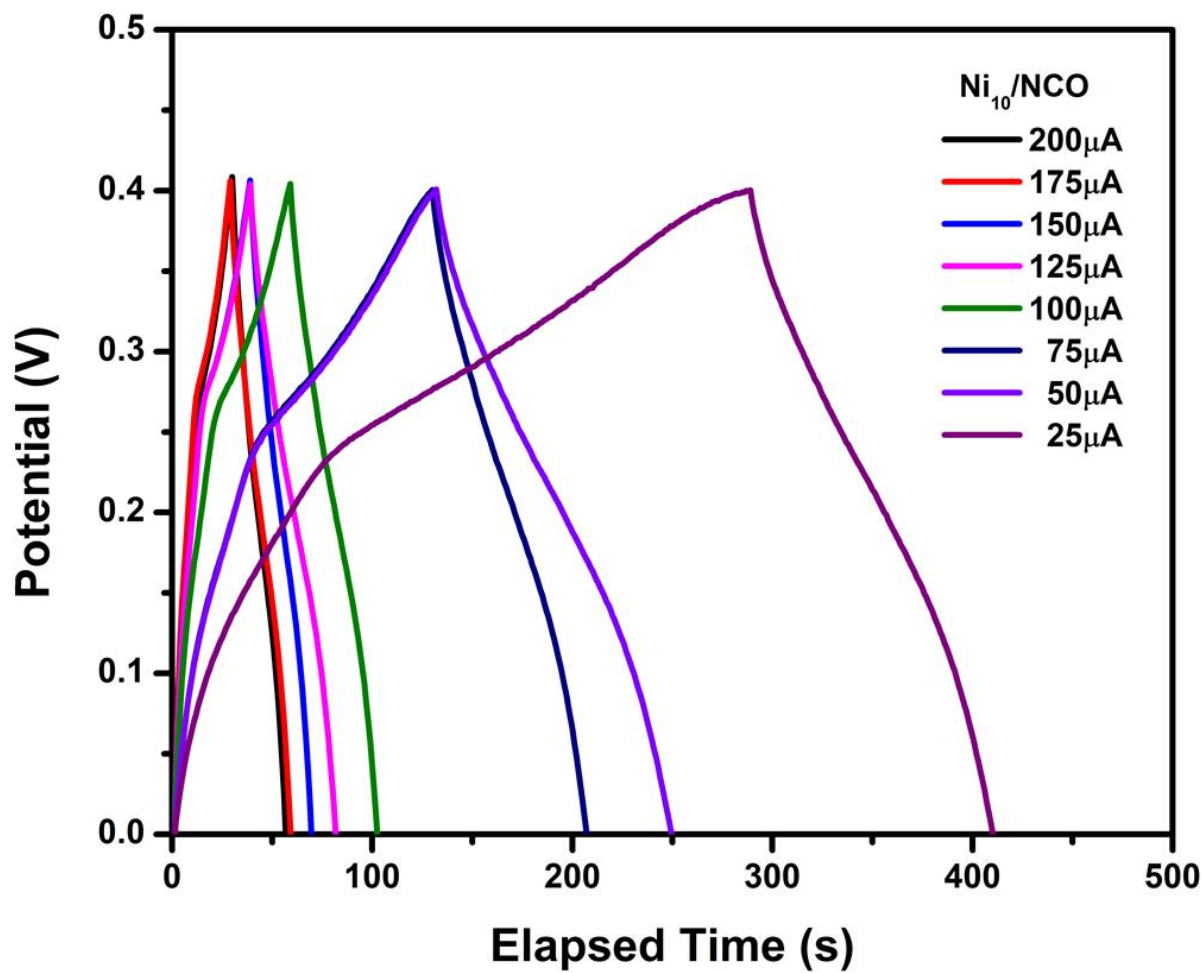

Fig. S7. GCD curves of Ni/NCO electrode at different applied currents.



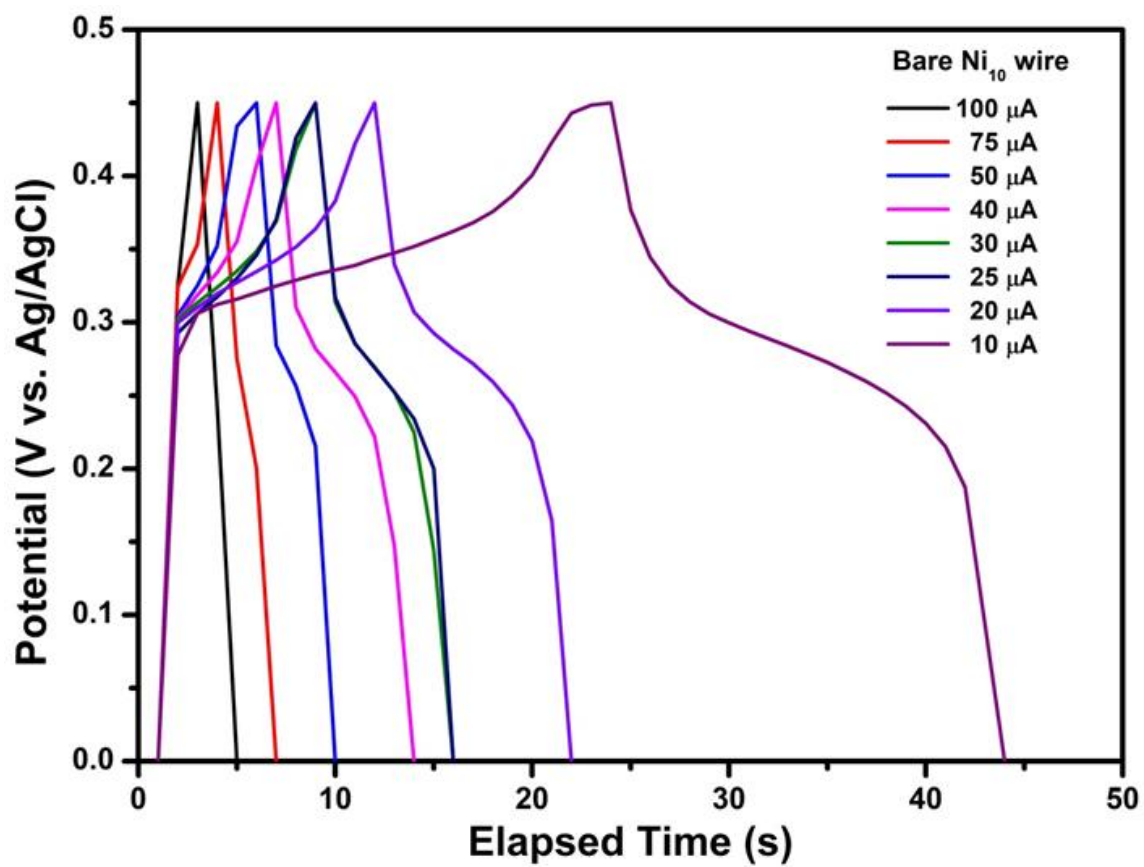

Fig. S8. GCD curves of bare Ni<sub>10</sub> wire electrode at different applied currents.

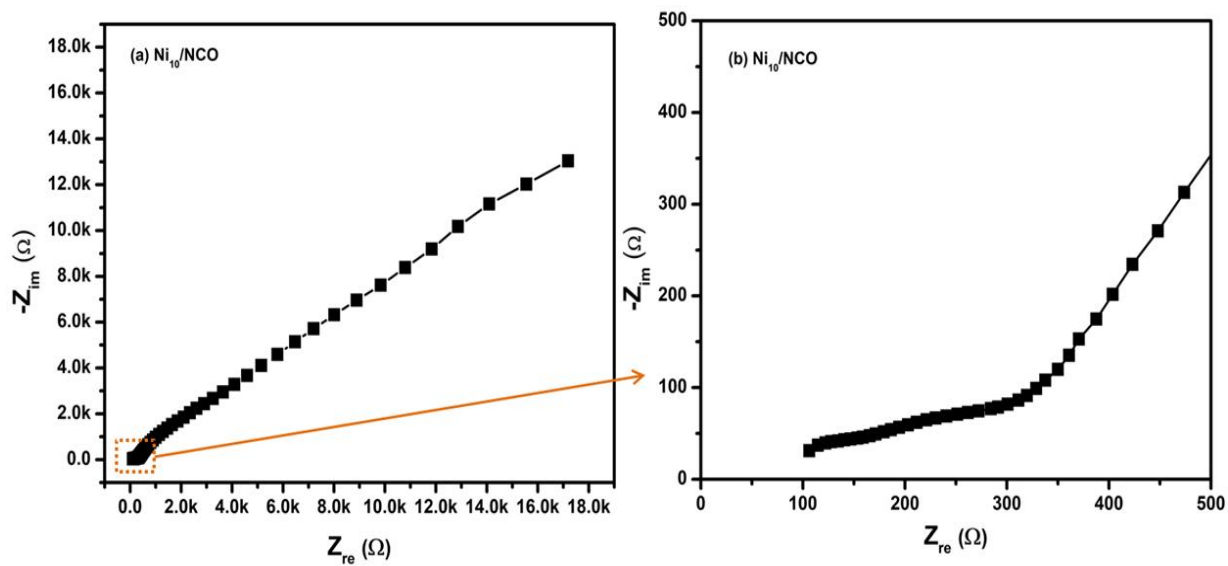

**Fig. S9.** EIS study (Nyquist plot) of the  $\text{Ni}/\text{NCO}$  electrode at 100 kHz-0.01 Hz under 0.01 V.
